# Supplementary material for: Elderly fall risk prediction using static posturography
Source: PubMed Central journal article supplement (PMC5319679; doi:10.1371/journal.pone.0172398), 2017-02-21
Supplement: pone.0172398.s001.pdf [file pone.0172398.s001.pdf]

Detailed Fall Information

Date of Fall: \_\_\_\_\_

*Please check the boxes as appropriate:*

When did this happen?

Morning       Afternoon

Evening       Night

Where did this happen?

Outside       At Home

At a Friend's       Other Indoor Location

Other: \_\_\_\_\_

Were you using your walker/cane/orthotics/other walking aid when the fall/near miss happened?

Yes       No       I don't have one

What do you think caused you to fall or almost fall?

Alcohol consumption in the last 12 hours: \_\_\_\_\_

Medications used in the last 12 hours: \_\_\_\_\_
